# Supplementary material
Source: PubMed Central journal article supplement (PMC3811570)
Supplement: EC.00151-13_zek999094147so1.pdf [file EC.00151-13_zek999094147so1.pdf]

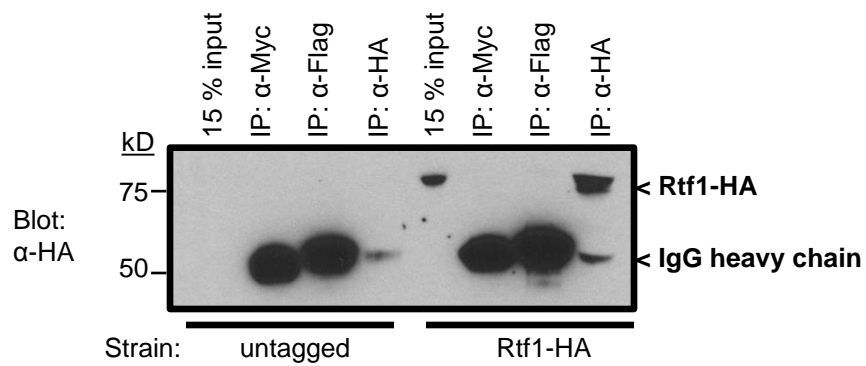

**Supplemental FIG 1. Rtf1 does not bind to antiFlag antibody conjugated beads and signal recognized by anti-HA antibody corresponds to Rtf1-HA.** Untagged parental strain or cells harboring HA-tagged Rtf1 were lysed and immunoprecipitated using anti-Myc, anti-Flag, or anti-HA antibodies. Immunoprecipitates were analyzed by SDS-PAGE and Western blotting using anti-HA antibodies.

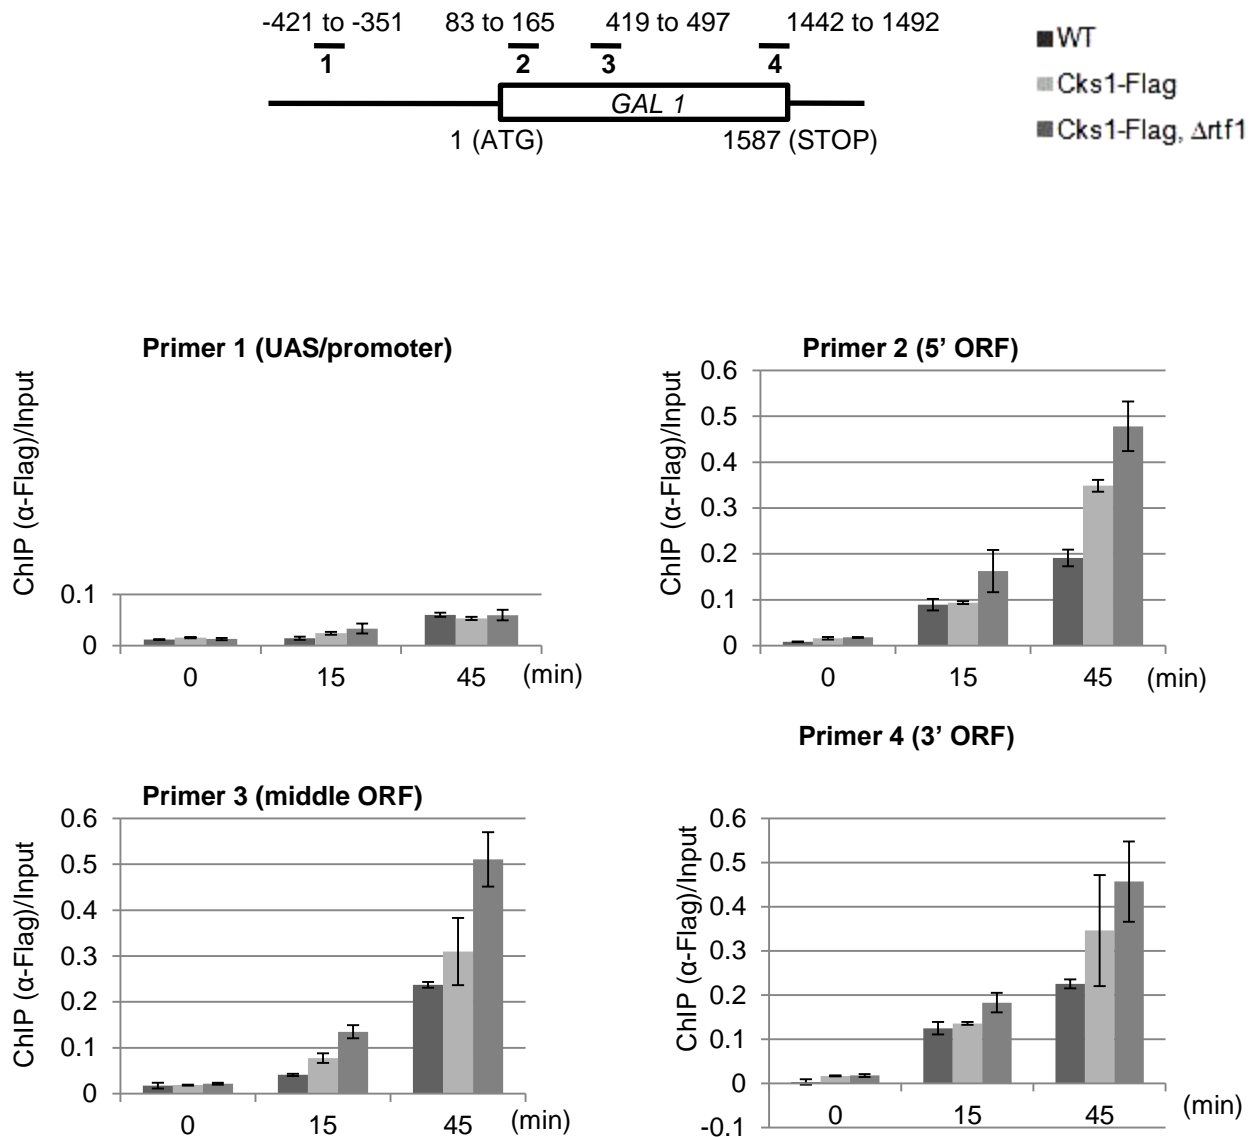

**Supplemental FIG 2. Recruitment of RNA polymerase II to the *GAL1* ORF in the absence of *Rtf1*.** Upon galactose induction for 15 or 45 min, chromatin immunoprecipitation using anti- RNA polymerase II antibodies was performed in wild-type, Cks1-Flag, and *rtf1* deletion mutant strains. RNA polymerase II-associated chromatin fragments were isolated, amplified using the indicated primers and normalized to the amount of input DNA prior to immunoprecipitation.

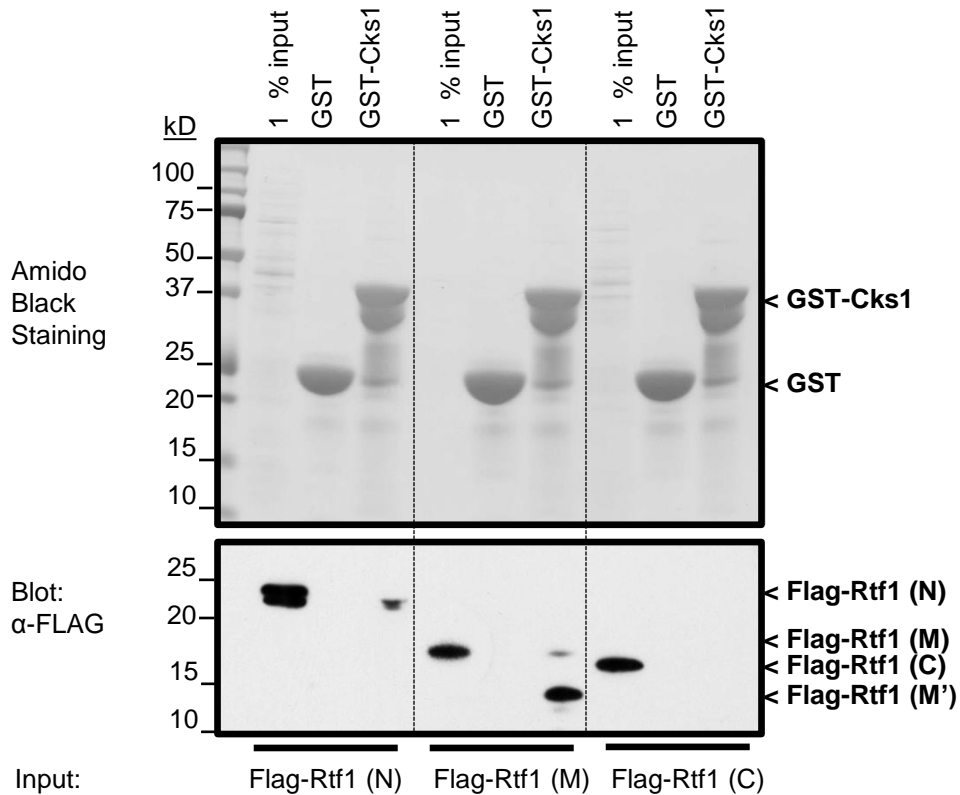

**Supplemental FIG. 3. A central fragment of Rtf1 binds to Cks1.** Immobilized GST or GST-Cks1 was incubated with crude extracts from *E. coli* expressing Flag-tagged Rtf1 fragments 1-200 a.a. (N), 201-395 a.a. (M), 396-559 a.a. (C). GST or GST-Cks1 is revealed by amido black staining (upper panel). Fragments of Rtf1 are detected by Western blotting using anti-FLAG antibodies (lower panel). Note that part of fragment (M) was proteolyzed to a smaller size (M') during the course of the experiment. Approximate molecular weights are indicated to the left of each blot.
